# Supplementary material for: Furan-Containing Chiral Spiro-Fused Polycyclic Aromatic Compounds: Synthesis and Photophysical Properties
Source: MDPI journal article supplement (doi:10.3390/molecules27165103), 2022-08-11
Supplement: s1 [file s1]

## Supporting Information

### Furan-Containing Chiral Spiro-Fused Polycyclic Aromatic Compounds: Synthesis and Photophysical Properties

Koji Nakano,<sup>\*,†</sup> Ko Takase,<sup>†</sup> Keiichi Noguchi<sup>‡</sup>

<sup>†</sup>*Department of Organic and Polymer Materials Chemistry, and <sup>‡</sup>Instrumentation Analysis Center, Tokyo University of Agriculture and Technology, 2-24-16 Naka-cho, Koganei, Tokyo 184-8588, Japan*

e-mail: k\_nakano@cc.tuat.ac.jp

## Table of Contents

|                                                                          |         |
|--------------------------------------------------------------------------|---------|
| <sup>1</sup> H <sup>13</sup> C, and <sup>19</sup> F Spectra of Compounds | S2–S10  |
| X-ray Analysis                                                           | S11     |
| Chiral HPLC Chart and UV–vis/PL Spectra                                  | S12     |
| Theoretical Calculation Results                                          | S13–S19 |

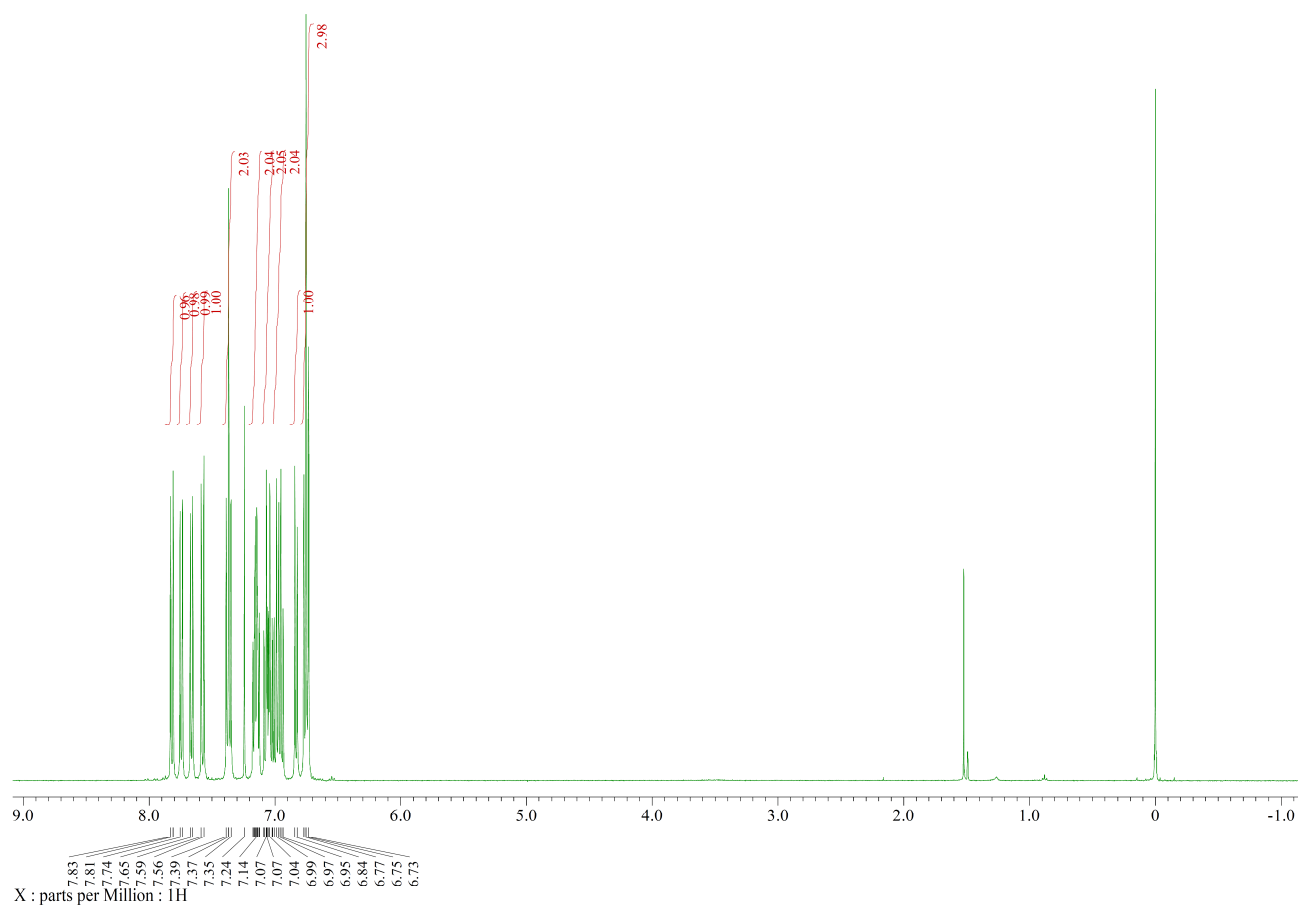

**Figure S1.** <sup>1</sup>H NMR spectrum of *rac*-1 (400 MHz, CDCl<sub>3</sub>).

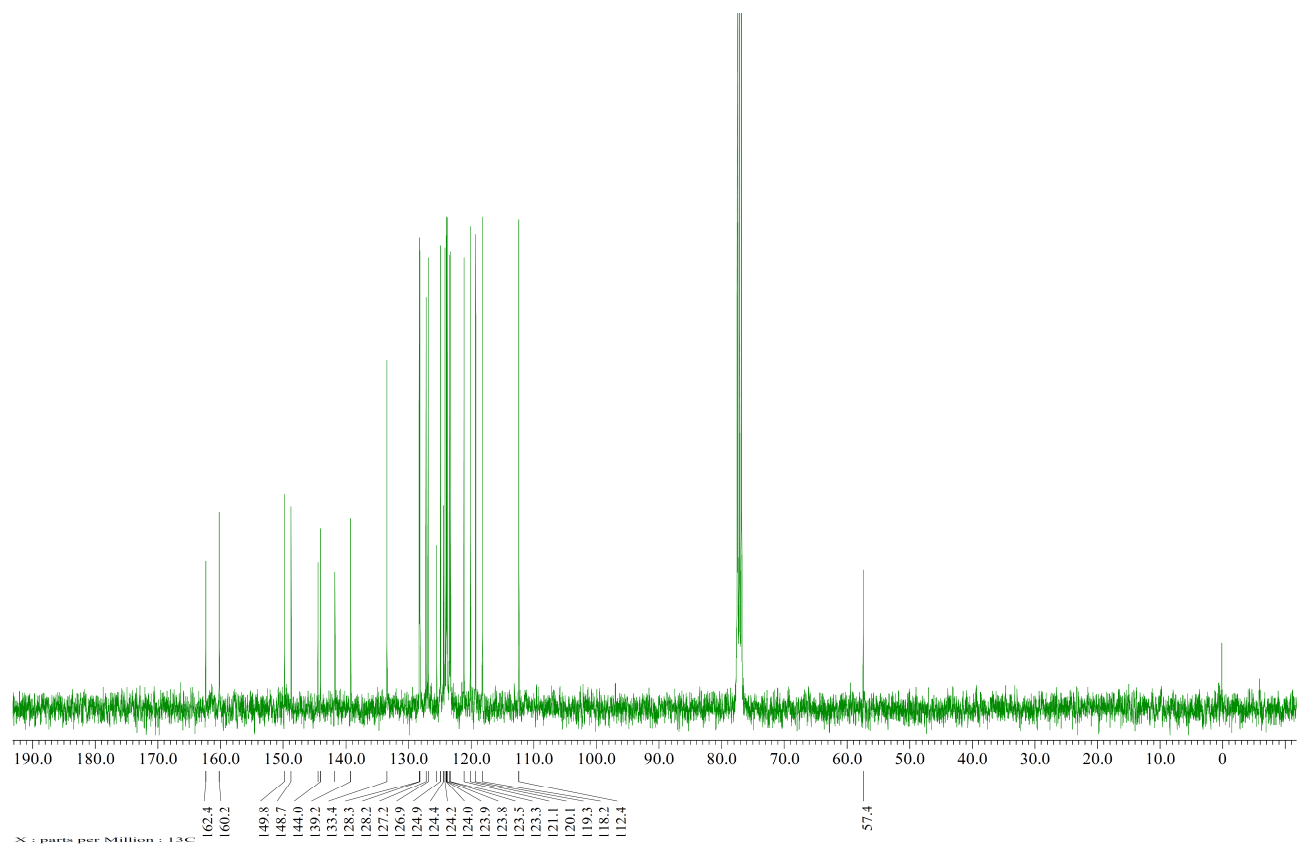

**Figure S2.** <sup>13</sup>C NMR spectrum of *rac*-1 (101 MHz, CDCl<sub>3</sub>).

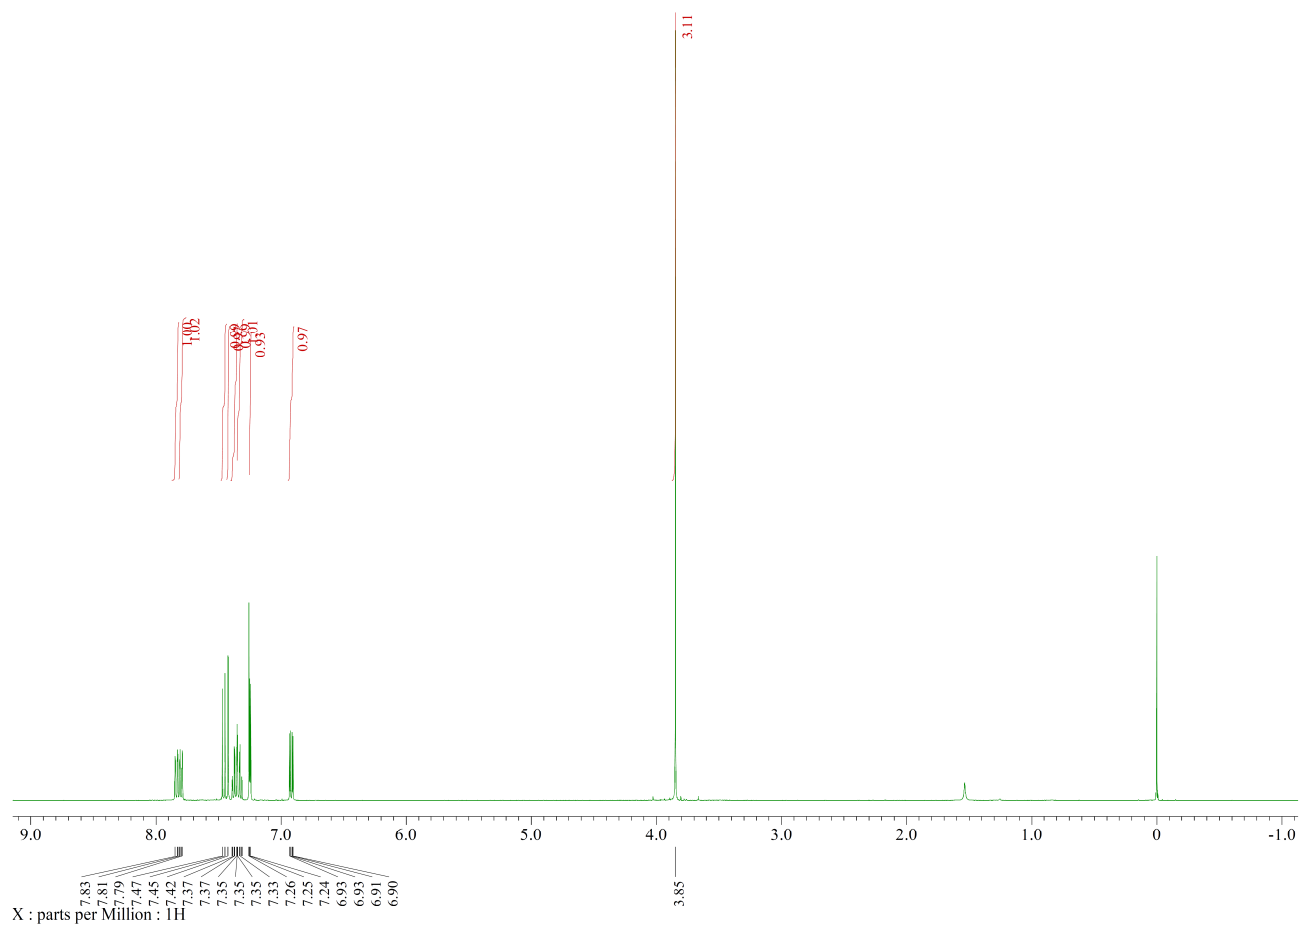

**Figure S3.** <sup>1</sup>H NMR spectrum of **7** (400 MHz, CDCl<sub>3</sub>).

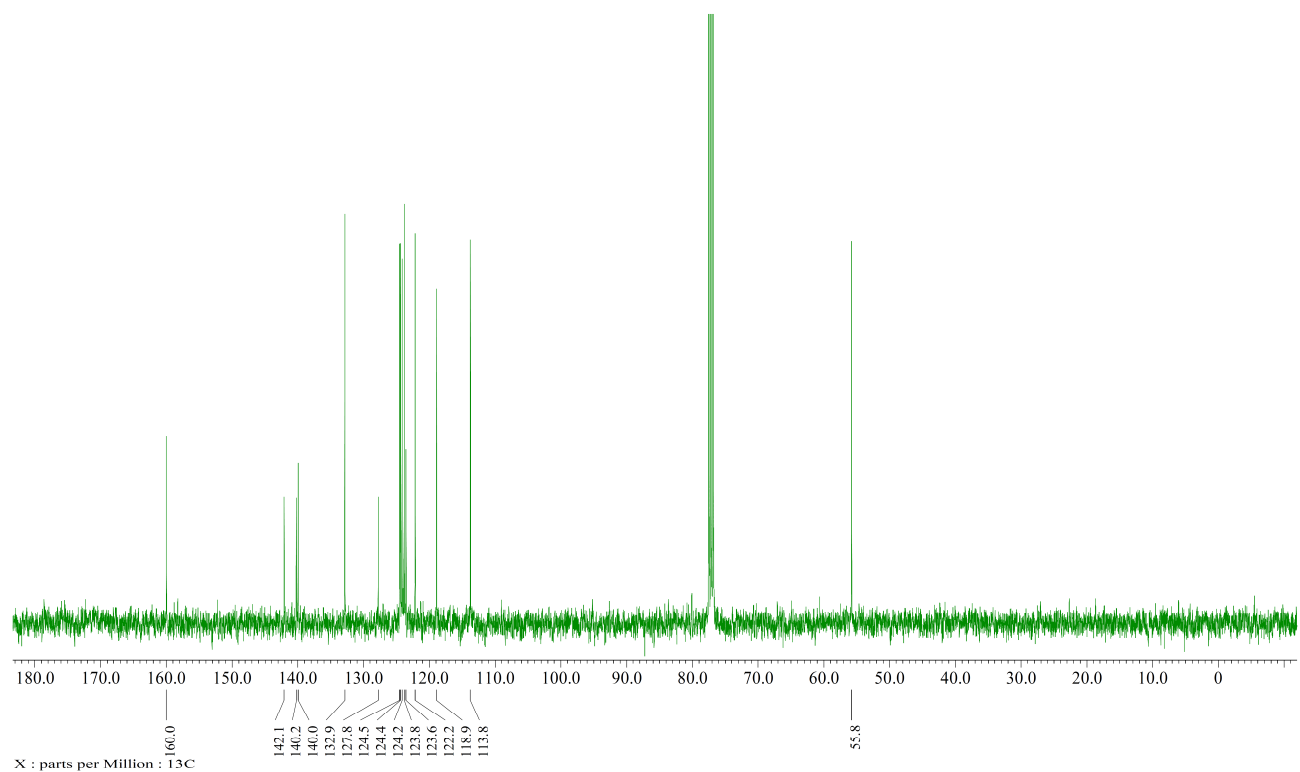

**Figure S4.** <sup>13</sup>C NMR spectrum of **7** (101 MHz, CDCl<sub>3</sub>).

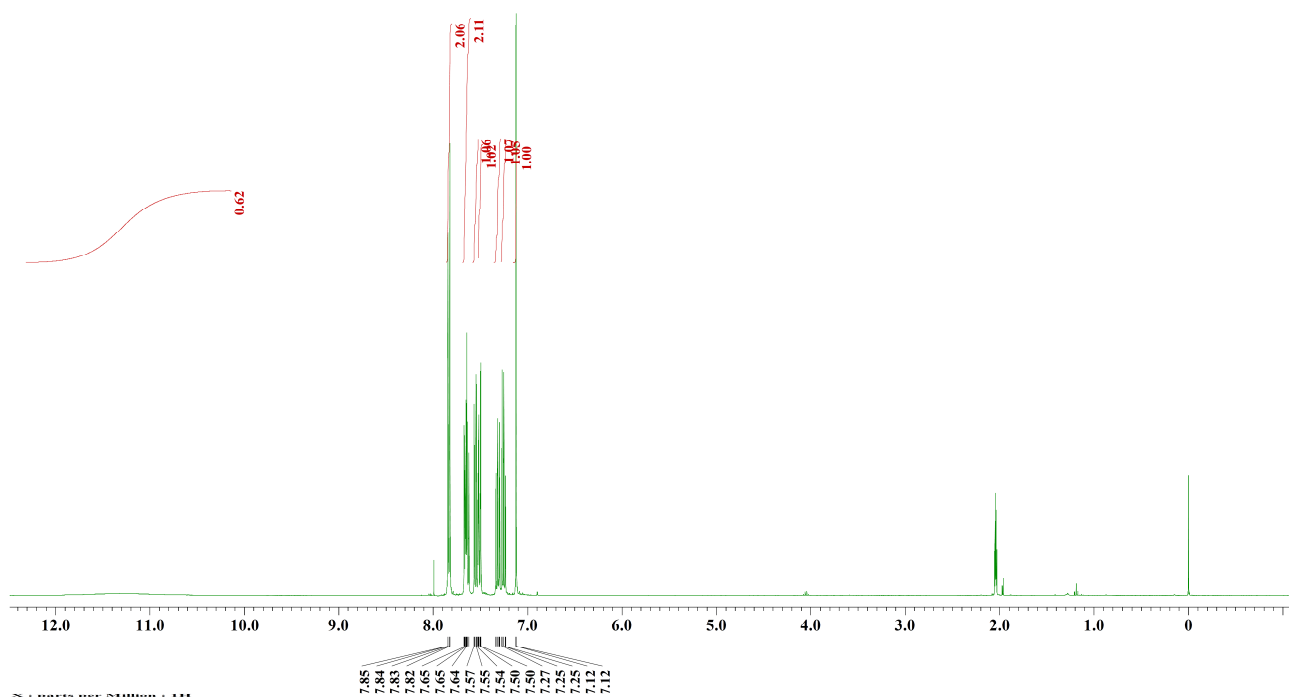

**Figure S5.**  $^1\text{H}$  NMR spectrum of **13** (400 MHz, acetone- $d_6$ ).

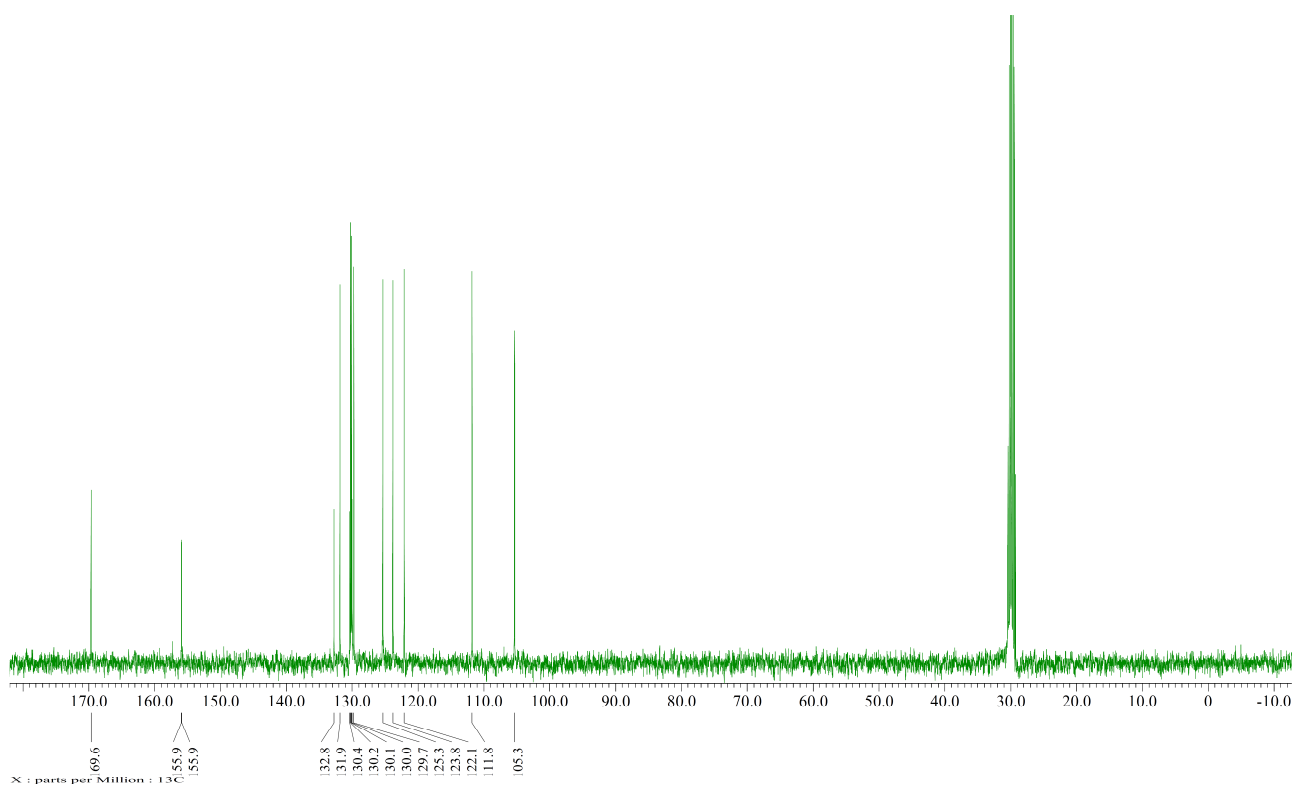

**Figure S6.**  $^{13}\text{C}$  NMR spectrum of **13** (101 MHz, acetone- $d_6$ ).

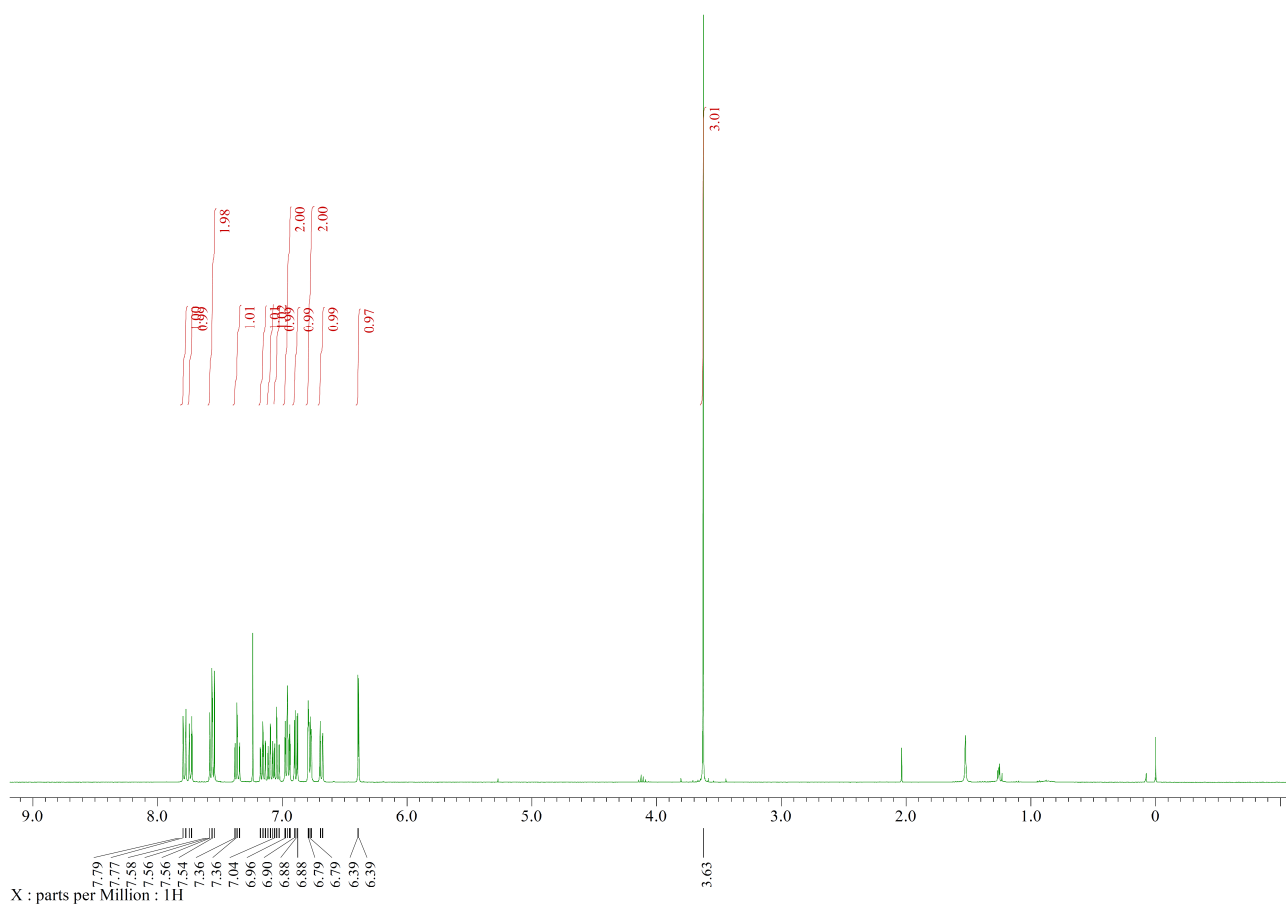

**Figure S7.** <sup>1</sup>H NMR spectrum of *rac*-**10** (400 MHz, CDCl<sub>3</sub>).

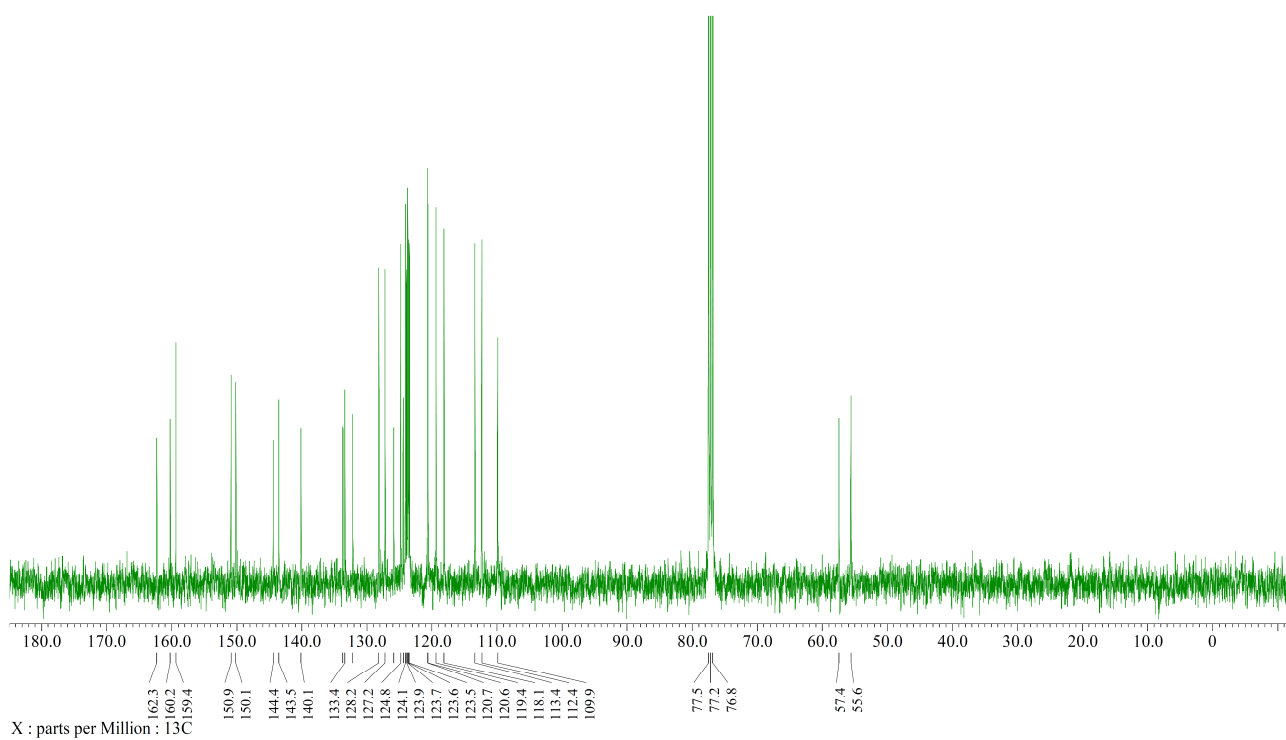

**Figure S8.** <sup>13</sup>C NMR spectrum of *rac*-**10** (101 MHz, CDCl<sub>3</sub>).

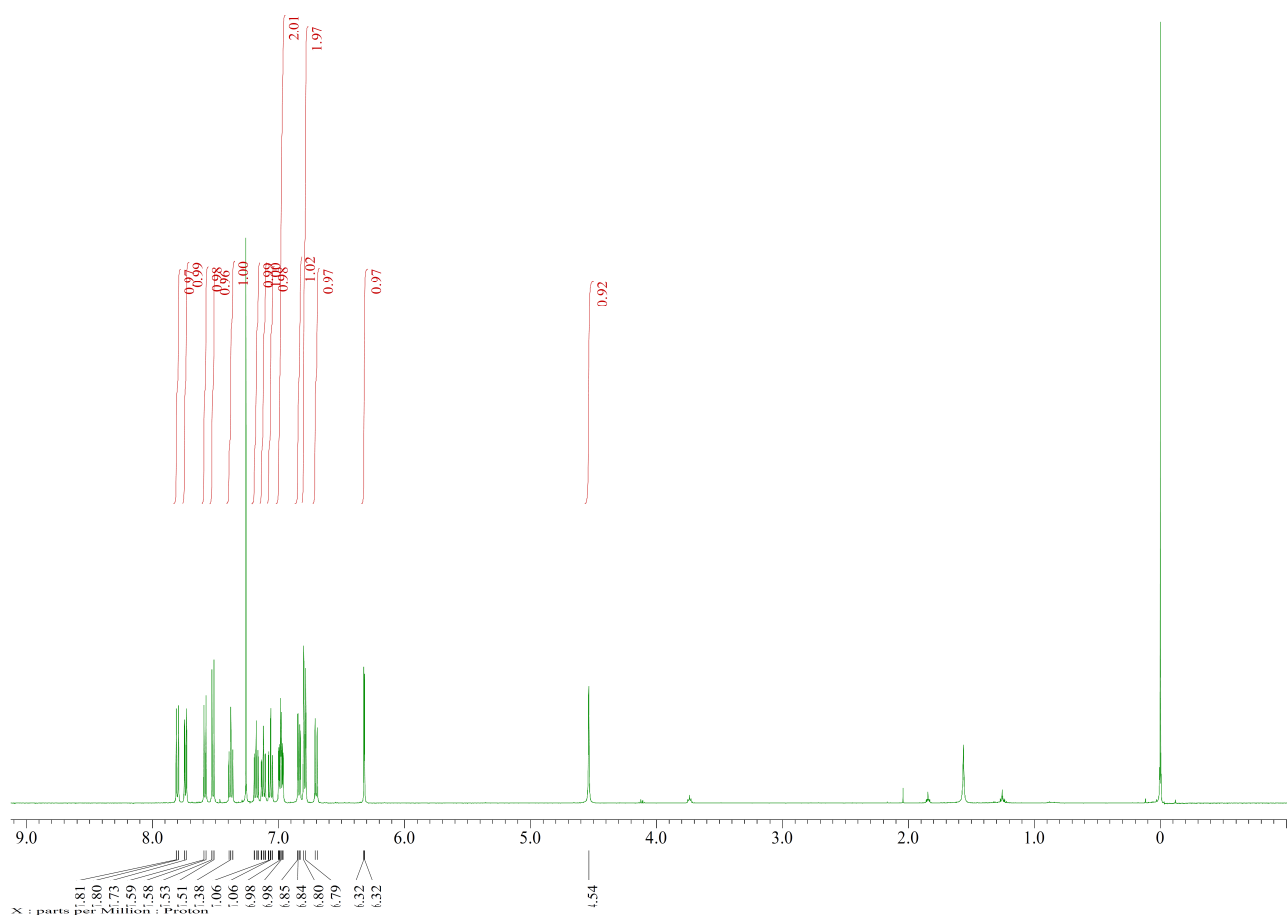

**Figure S9.** <sup>1</sup>H NMR spectrum of *rac*-**11** (500 MHz, CDCl<sub>3</sub>).

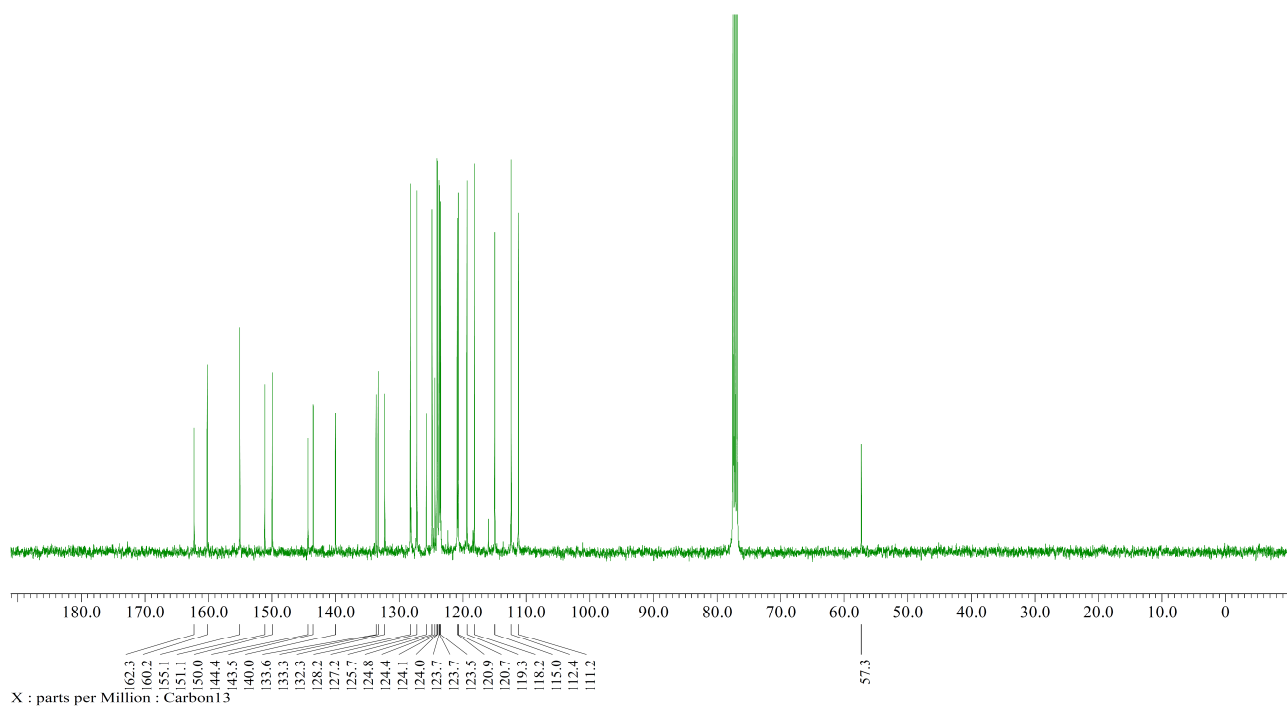

**Figure S10.** <sup>13</sup>C NMR spectrum of *rac*-**11** (101 MHz, CDCl<sub>3</sub>).

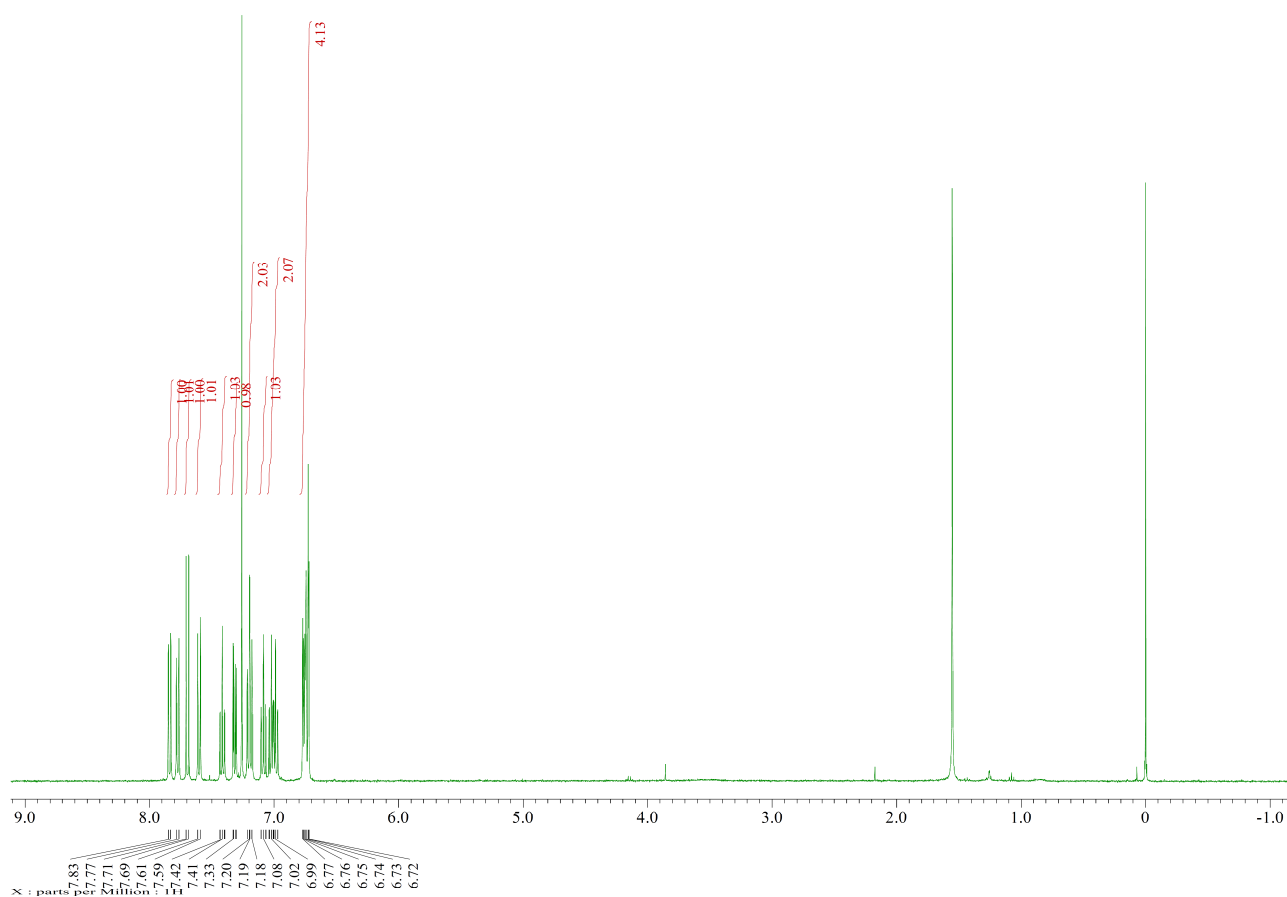

**Figure S11.**  $^1\text{H}$  NMR spectrum of *rac*-**12** (400 MHz,  $\text{CDCl}_3$ ).

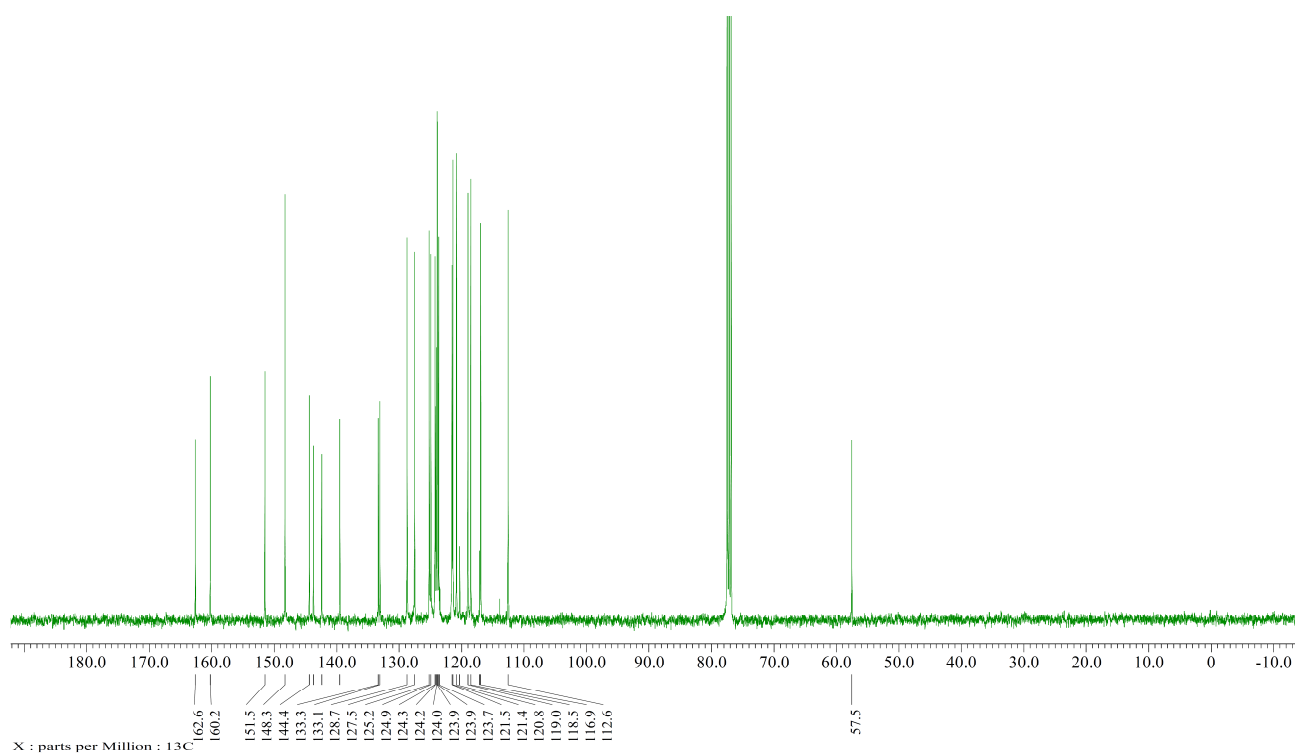

**Figure S12.**  $^{13}\text{C}$  NMR spectrum of *rac*-**12** (101 MHz,  $\text{CDCl}_3$ ).

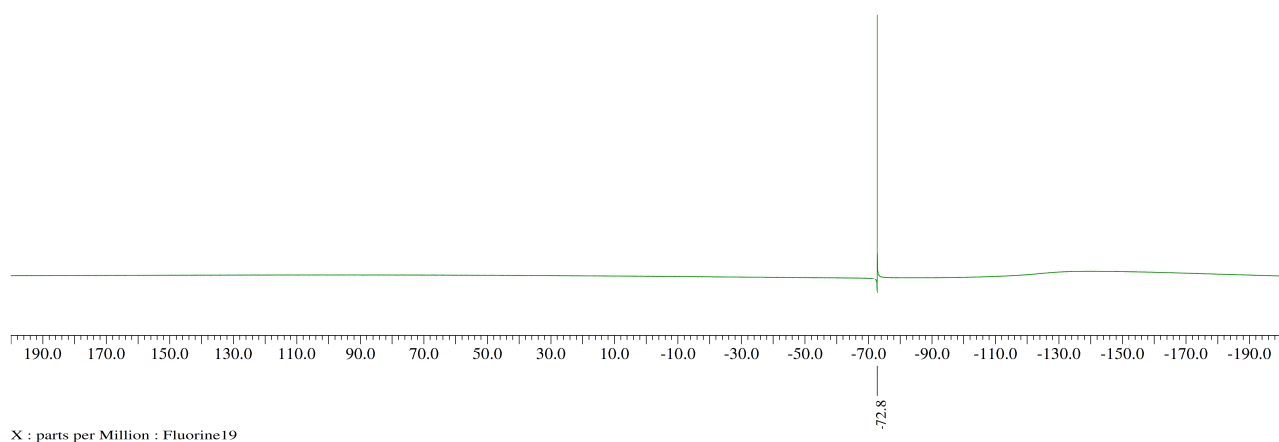

**Figure S13.**  $^{19}\text{F}$  NMR spectrum of *rac*-**12** (376 MHz,  $\text{CDCl}_3$ ).



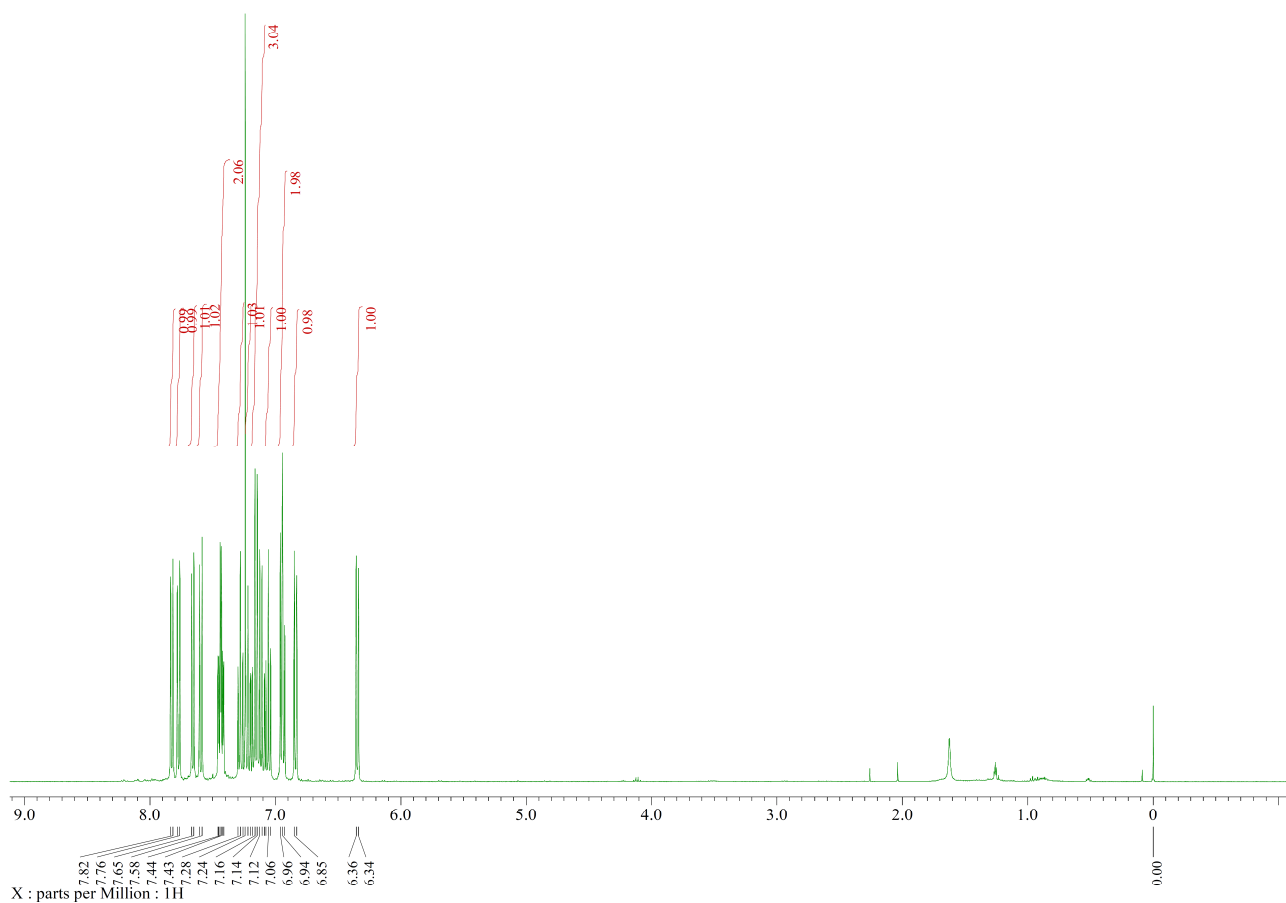

**Figure S14.** <sup>1</sup>H NMR spectrum of *rac-2* (400 MHz, CDCl<sub>3</sub>).

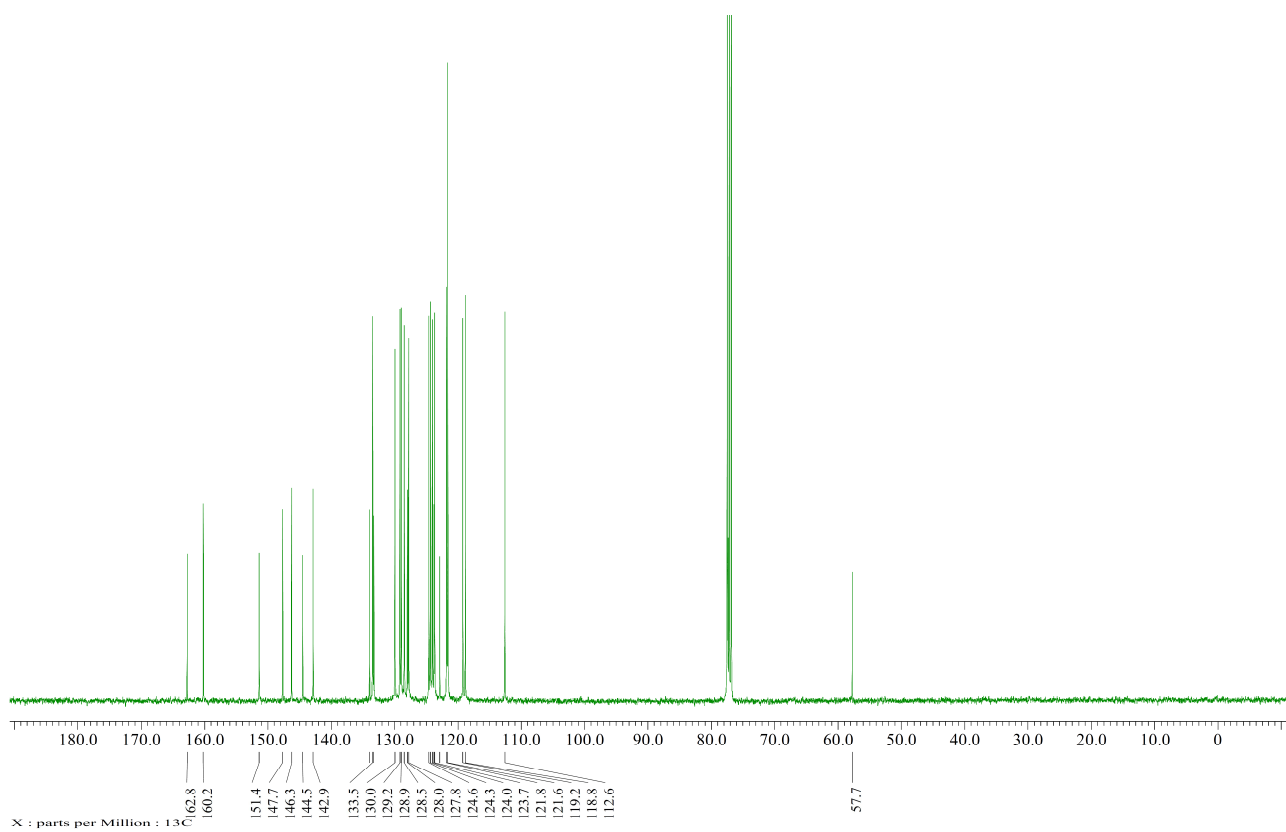

**Figure S15.** <sup>13</sup>C NMR spectrum of *rac-2* (101 MHz, CDCl<sub>3</sub>).

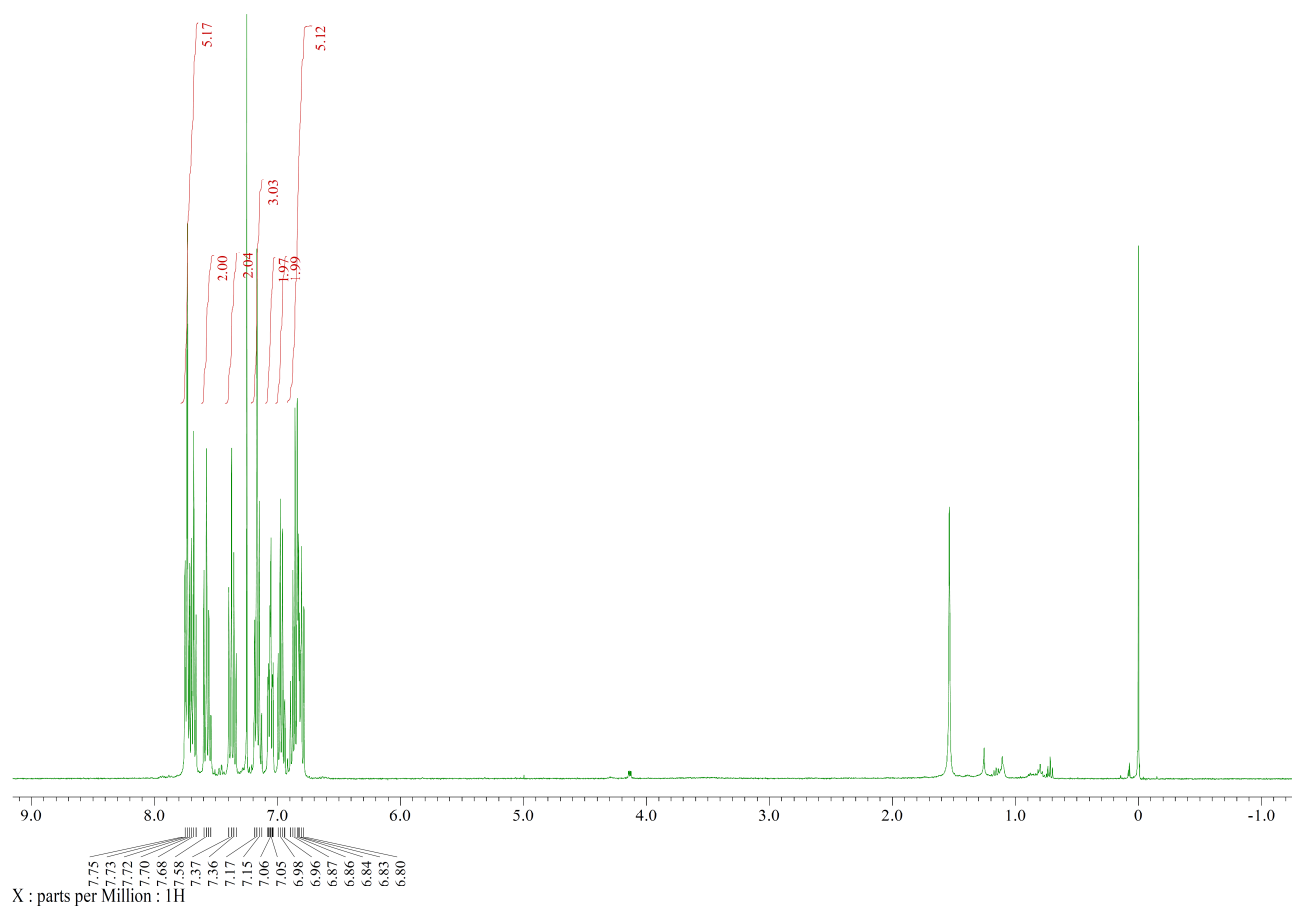

**Figure S16.** <sup>1</sup>H NMR spectrum of *rac-3* (400 MHz, CDCl<sub>3</sub>).

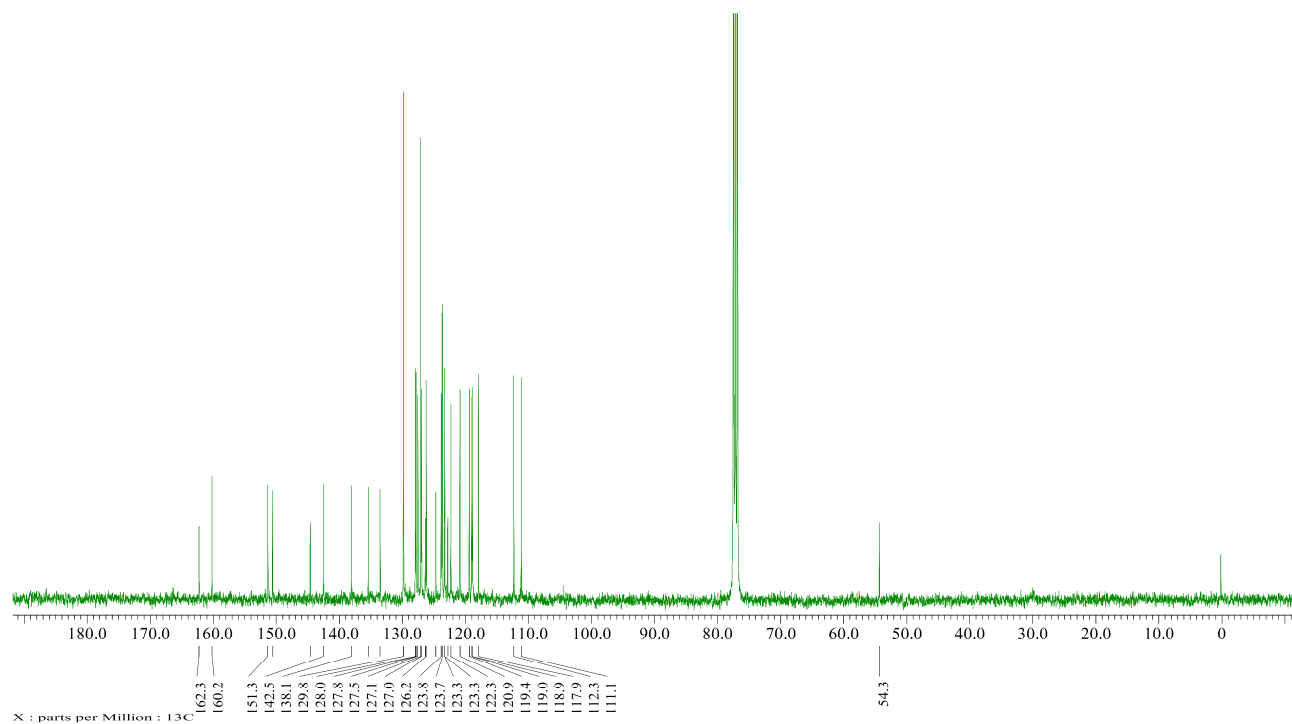

**Figure S17.** <sup>13</sup>C NMR spectrum of *rac-3* (101 MHz, CDCl<sub>3</sub>).

**Table S1.** Crystallographic data and structure refinement details for *rac-1*

|                                                     |                                                                 |                          |
|-----------------------------------------------------|-----------------------------------------------------------------|--------------------------|
| Formula                                             | C <sub>29</sub> H <sub>16</sub> OS                              |                          |
| Formula weight                                      | 412.48                                                          |                          |
| Temperature                                         | 193(2) K                                                        |                          |
| Wavelength                                          | 1.54187 Å                                                       |                          |
| Crystal system                                      | monoclinic                                                      |                          |
| Space group                                         | <i>P</i> 2 <sub>1</sub> / <i>n</i>                              |                          |
| Unit cell dimensions                                | <i>a</i> = 14.2753(3) Å                                         | <i>α</i> = 90°           |
|                                                     | <i>b</i> = 9.8401(2) Å                                          | <i>β</i> = 114.4630(10)° |
|                                                     | <i>c</i> = 15.7643(3) Å                                         | <i>γ</i> = 90°           |
| Volume                                              | 2015.63(7) Å <sup>3</sup>                                       |                          |
| <i>Z</i>                                            | 4                                                               |                          |
| Density (calculated)                                | 1.359 g/cm <sup>3</sup>                                         |                          |
| Absorption coefficient                              | 1.566 mm <sup>-1</sup>                                          |                          |
| <i>F</i> (000)                                      | 856                                                             |                          |
| Crystal size                                        | 0.50 × 0.40 × 0.30 mm <sup>3</sup>                              |                          |
| Theta range for data collection                     | 3.519 to 68.226°                                                |                          |
| Index ranges                                        | −17 ≤ <i>h</i> ≤ 17, −11 ≤ <i>k</i> ≤ 11, −18 ≤ <i>l</i> ≤ 18   |                          |
| Reflections collected                               | 34993                                                           |                          |
| Independent reflections                             | 3684 [ <i>R</i> <sub>int</sub> = 0.0448]                        |                          |
| Completeness to theta                               | 100.0%                                                          |                          |
| Max. and min. transmission                          | 0.625 and 0.492                                                 |                          |
| Refinement method                                   | Full-matrix least-squares on <i>F</i> <sup>2</sup>              |                          |
| Data / restraints / parameters                      | 3684 / 0 / 280                                                  |                          |
| Goodness-of-fit on <i>F</i> <sup>2</sup>            | 1.046                                                           |                          |
| Final <i>R</i> indices [ <i>I</i> > 2σ( <i>I</i> )] | <i>R</i> <sub>1</sub> = 0.0688, <i>wR</i> <sub>2</sub> = 0.1992 |                          |
| <i>R</i> indices (all data)                         | <i>R</i> <sub>1</sub> = 0.0729, <i>wR</i> <sub>2</sub> = 0.2028 |                          |
| Largest diff. peak and hole                         | 1.219 and −0.486 e/Å <sup>3</sup>                               |                          |

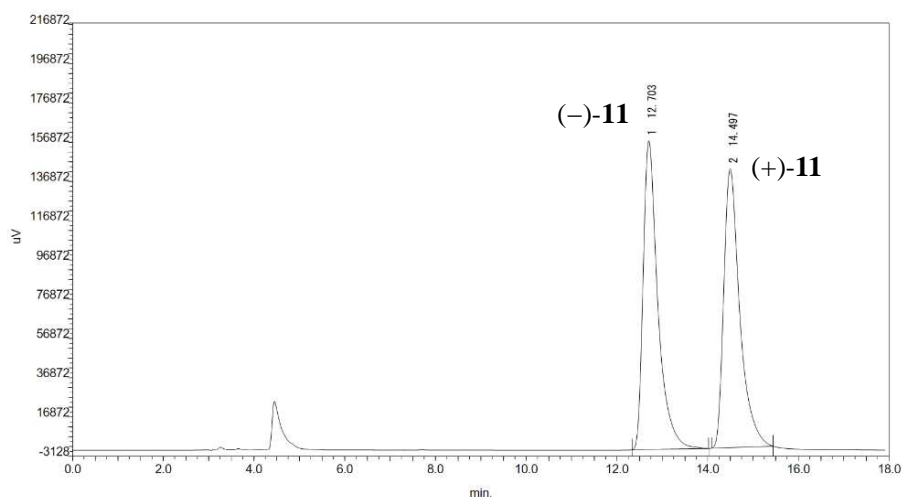

**Figure S18.** HPLC chart of *rac*-**11** with a DAICEL CHIEAPAK® IA-3 column (flow rate: 1.0 mL/min; eluent: hexane/CHCl<sub>3</sub> =50/50)].

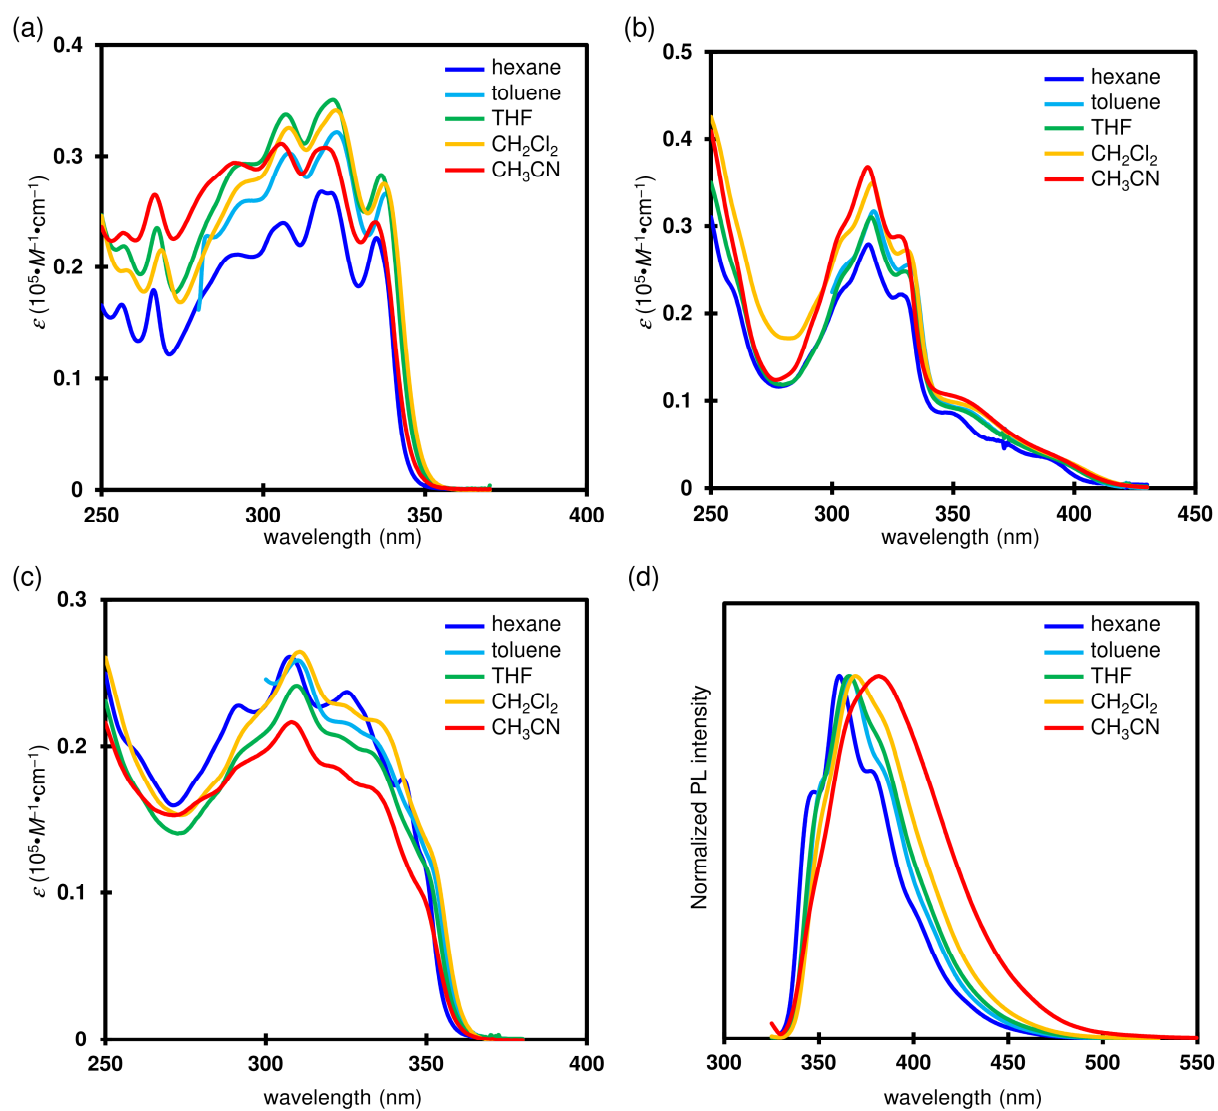

**Figure S19.** UV–vis absorption of (a) *rac*-**1**, (b) *rac*-**2**, and (c) *rac*-**3** and (d) PL spectra of *rac*-**1** in various solvents.

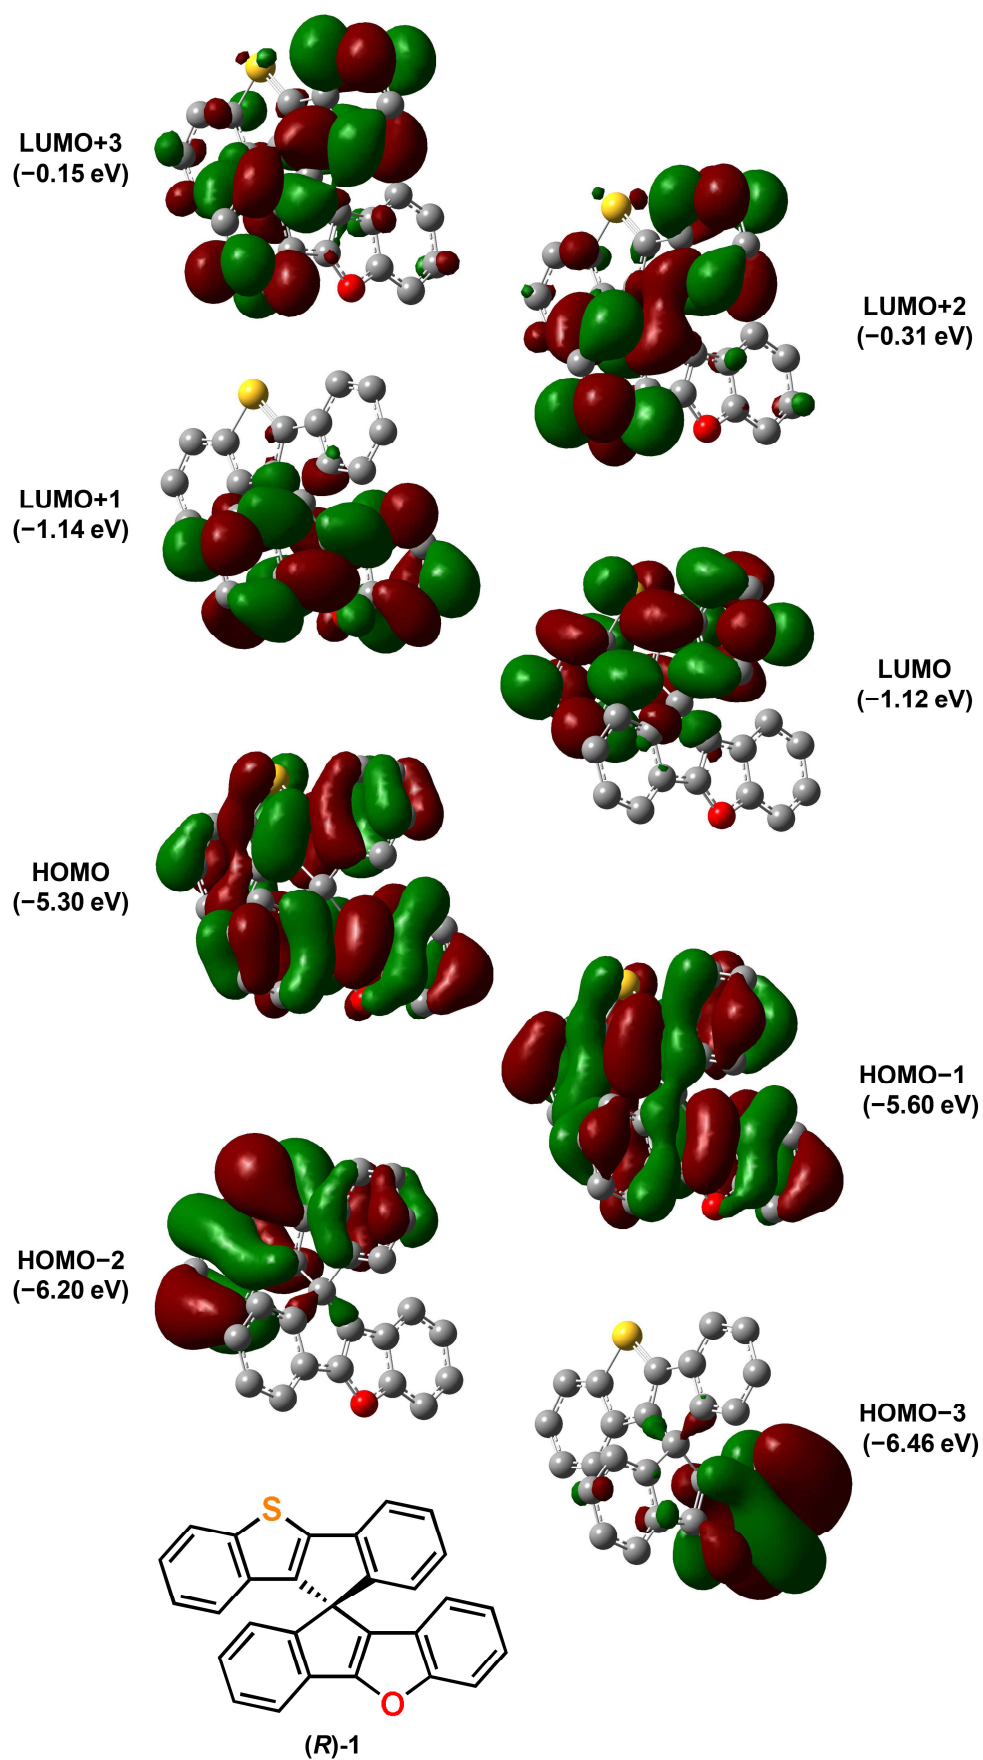

**Figure S20.** Molecular orbitals of (R)-1 calculated by DFT method at the B3LYP/6-31G(d) level of theory.

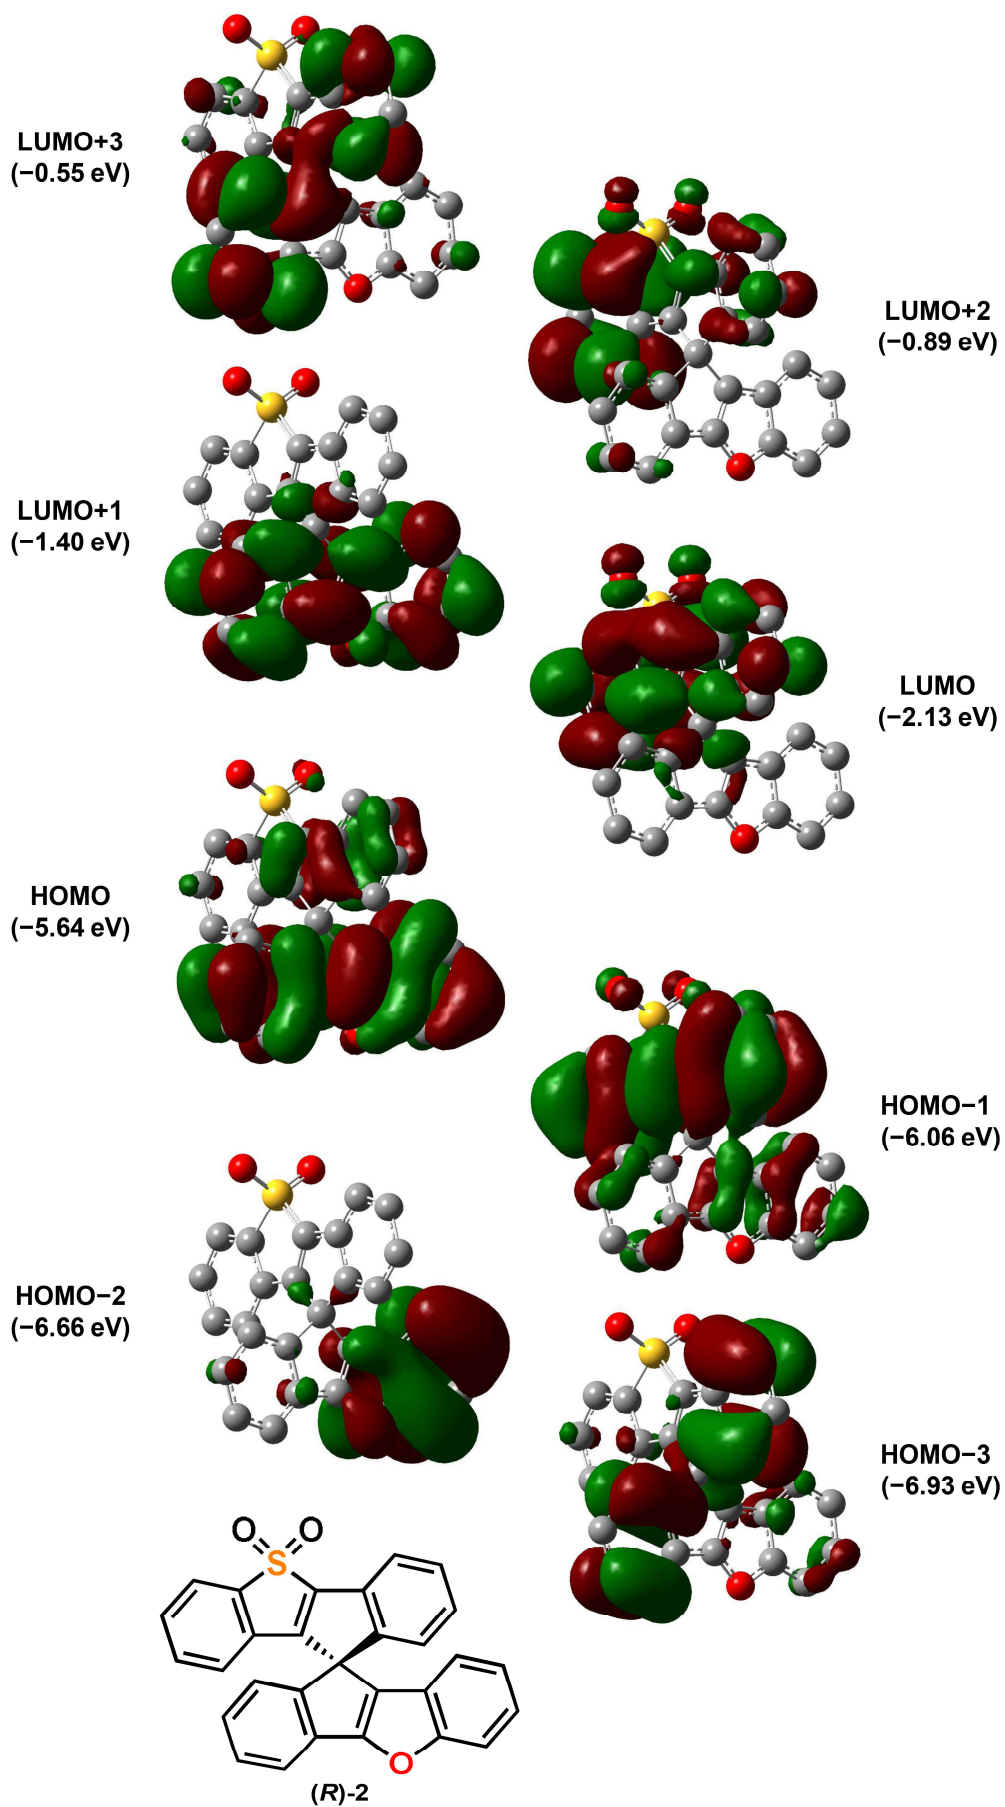

**Figure S21.** Molecular orbitals of (*R*)-2 calculated by DFT method at the B3LYP/6-31G(d) level of theory.

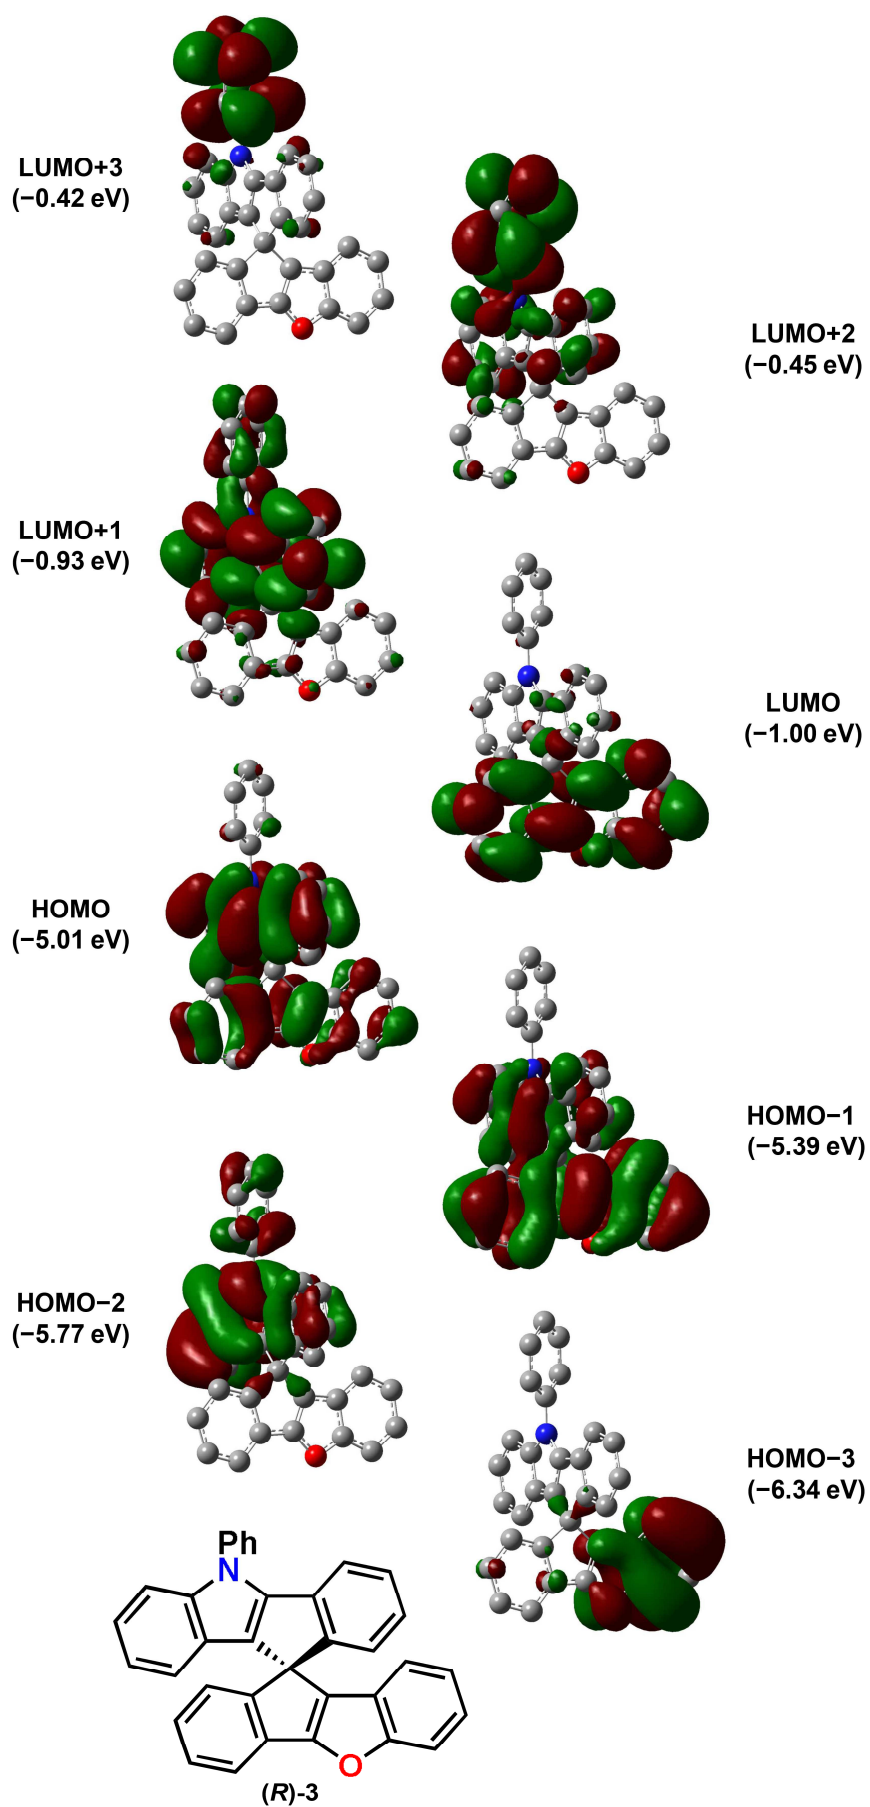

**Figure S22.** Molecular orbitals of (*R*)-**3** calculated by DFT method at the B3LYP/6-31G(d) level of theory.

**Table S2.** Coordinates (Å) and absolute energy of the optimized structure for (*R*)-**1**<sup>a</sup>

| atom | x         | y         | z         | atom | x         | y         | z         |
|------|-----------|-----------|-----------|------|-----------|-----------|-----------|
| C    | -1.952556 | 0.713568  | -0.980512 | C    | 0.908700  | 1.079226  | 4.474445  |
| C    | -1.218143 | -0.066353 | -0.130187 | C    | 1.443432  | 0.319601  | 2.264482  |
| C    | -1.839531 | -1.319636 | 0.184752  | C    | -0.632506 | 1.523600  | 2.642659  |
| C    | -3.090107 | -1.441756 | -0.483274 | C    | -0.286602 | 1.624666  | 3.998632  |
| C    | -1.274387 | 1.969390  | -1.268473 | C    | 1.789044  | 0.418749  | 3.611005  |
| C    | 0.488915  | 4.113317  | -1.427488 | H    | -1.563855 | 1.948774  | 2.278381  |
| C    | -1.608536 | 3.063616  | -2.066023 | H    | -0.957772 | 2.132506  | 4.685612  |
| C    | -0.057493 | 1.947510  | -0.547451 | H    | 2.717980  | -0.006735 | 3.978901  |
| C    | 0.824751  | 3.013453  | -0.625482 | H    | 1.158335  | 1.167717  | 5.528240  |
| C    | -0.714295 | 4.136363  | -2.138087 | C    | 1.351249  | -0.134100 | -0.033818 |
| H    | -2.542224 | 3.083868  | -2.621634 | C    | 2.107253  | -0.770625 | -1.075829 |
| H    | 1.761881  | 2.998158  | -0.075379 | C    | 4.119451  | -2.159510 | -2.436201 |
| H    | -0.958553 | 4.996642  | -2.755308 | C    | 3.267895  | -1.257354 | -0.419542 |
| H    | 1.172467  | 4.954901  | -1.497209 | C    | 1.972016  | -0.997547 | -2.454161 |
| C    | -3.439973 | -3.603759 | 0.486482  | C    | 2.981736  | -1.690256 | -3.116919 |
| H    | -4.049561 | -4.494158 | 0.612259  | C    | 4.280988  | -1.948368 | -1.065557 |
| C    | -3.890638 | -2.575737 | -0.337352 | H    | 1.097902  | -0.639923 | -2.989466 |
| H    | -4.843128 | -2.655337 | -0.853564 | H    | 2.890242  | -1.873593 | -4.183872 |
| C    | -2.207916 | -3.501219 | 1.155503  | H    | 5.152311  | -2.303533 | -0.525078 |
| H    | -1.876364 | -4.315491 | 1.793788  | H    | 4.887809  | -2.696505 | -2.984852 |
| C    | -1.409765 | -2.374312 | 1.011911  | C    | 2.078038  | -0.277245 | 1.107931  |
| H    | -0.459360 | -2.299134 | 1.531127  | O    | 3.248710  | -0.951781 | 0.931479  |
| C    | 0.077066  | 0.637554  | 0.252558  | S    | -3.460954 | -0.017354 | -1.471410 |
| C    | 0.231493  | 0.872791  | 1.777457  |      |           |           |           |

absolute energy E (B3LYP): -1588.14244225 au

<sup>a</sup>Calculated by DFT method [B3LYP/6-31G(d)]



**Table S3.** Coordinates (Å) and absolute energy of the optimized structure for (*R*)-**2**<sup>a</sup>

| atom | x         | y         | z         | atom | x         | y         | z         |
|------|-----------|-----------|-----------|------|-----------|-----------|-----------|
| C    | 1.803199  | 0.692254  | 0.542259  | C    | -2.073923 | 0.318492  | -2.070142 |
| C    | 0.928803  | -0.073780 | -0.148048 | C    | -0.070306 | 1.476036  | -2.817100 |
| C    | 1.423834  | -1.387385 | -0.561583 | C    | -0.634024 | 1.549792  | -4.099974 |
| C    | 2.751328  | -1.593741 | -0.137523 | C    | -2.634676 | 0.391531  | -3.343785 |
| C    | 1.229610  | 1.973213  | 0.920810  | H    | 0.913323  | 1.895287  | -2.623287 |
| C    | -0.410213 | 4.171761  | 1.335144  | H    | -0.078539 | 2.029310  | -4.900817 |
| C    | 1.734381  | 3.063068  | 1.628716  | H    | -3.617652 | -0.024736 | -3.542759 |
| C    | -0.092537 | 1.979189  | 0.417426  | H    | -2.317822 | 1.082541  | -5.357443 |
| C    | -0.915745 | 3.074830  | 0.623374  | C    | -1.610965 | -0.082624 | 0.193679  |
| C    | 0.897525  | 4.164603  | 1.829906  | C    | -2.193594 | -0.676471 | 1.364610  |
| H    | 2.749352  | 3.055500  | 2.014039  | C    | -3.976340 | -1.988755 | 3.073718  |
| H    | -1.933554 | 3.085811  | 0.243045  | C    | -3.453977 | -1.154790 | 0.921238  |
| H    | 1.269115  | 5.025010  | 2.379146  | C    | -1.835666 | -0.872148 | 2.707546  |
| H    | -1.044451 | 5.037346  | 1.504549  | C    | -2.734211 | -1.527183 | 3.545282  |
| C    | 2.794100  | -3.763552 | -1.124431 | C    | -4.358478 | -1.808396 | 1.743200  |
| H    | 3.315376  | -4.689527 | -1.348216 | H    | -0.879256 | -0.521188 | 3.082666  |
| C    | 3.450557  | -2.755675 | -0.401810 | H    | -2.471106 | -1.686439 | 4.587108  |
| H    | 4.473647  | -2.884787 | -0.061889 | H    | -5.312764 | -2.158117 | 1.363305  |
| C    | 1.478938  | -3.581220 | -1.555602 | H    | -4.652468 | -2.495656 | 3.755959  |
| H    | 0.983853  | -4.370160 | -2.114560 | C    | -2.517837 | -0.238893 | -0.809655 |
| C    | 0.783654  | -2.397645 | -1.280618 | O    | -3.652699 | -0.883206 | -0.423648 |
| H    | -0.238017 | -2.266189 | -1.621193 | S    | 3.365616  | -0.148013 | 0.769709  |
| C    | -0.393850 | 0.662541  | -0.319712 | O    | 4.436725  | 0.521147  | 0.016621  |
| C    | -0.790564 | 0.861879  | -1.805782 | O    | 3.579763  | -0.474882 | 2.187276  |
| C    | -1.898890 | 1.014691  | -4.357308 |      |           |           |           |

absolute energy E (B3LYP): -1738.49812445 au

<sup>a</sup>Calculated by DFT method [B3LYP/6-31G(d)]

**Table S4.** Coordinates (Å) and absolute energy of the optimized structure for (*R*)-**3**<sup>a</sup>

| atom | x         | y         | z         | atom | x         | y         | z         |
|------|-----------|-----------|-----------|------|-----------|-----------|-----------|
| H    | 3.819280  | -1.969443 | -2.299164 | H    | 2.837248  | 1.461118  | 2.427472  |
| C    | 2.746894  | -1.843217 | -2.408289 | H    | -2.078842 | 2.310088  | 2.135841  |
| C    | -0.061901 | -1.492334 | -2.727400 | H    | 1.695152  | 2.833057  | 4.148215  |
| C    | 2.012611  | -1.070374 | -1.505228 | H    | -0.739722 | 3.263371  | 4.007949  |
| C    | 2.057457  | -2.442814 | -3.458377 | C    | 0.219568  | -0.005684 | -0.588616 |
| C    | 0.667638  | -2.273532 | -3.613661 | C    | -1.003873 | 0.664490  | 0.000880  |
| C    | 0.604643  | -0.870800 | -1.656896 | C    | -1.708381 | 1.659332  | -0.958435 |
| H    | 2.605235  | -3.051408 | -4.172580 | C    | -3.351858 | 3.205899  | -2.598364 |
| H    | 0.161649  | -2.759000 | -4.443657 | C    | -1.165936 | 2.741031  | -1.632324 |
| H    | -1.131470 | -1.355773 | -2.856841 | C    | -3.083343 | 1.346524  | -1.109227 |
| N    | 2.452128  | -0.352827 | -0.380998 | C    | -3.911316 | 2.114256  | -1.926097 |
| C    | 3.799214  | -0.247609 | 0.064449  | C    | -1.996817 | 3.516070  | -2.455301 |
| C    | 6.450753  | -0.040720 | 0.930474  | H    | -0.112042 | 2.984358  | -1.527340 |
| C    | 4.526897  | -1.402527 | 0.375331  | H    | -4.963337 | 1.869052  | -2.038098 |
| C    | 4.401514  | 1.010632  | 0.184376  | H    | -1.579928 | 4.365937  | -2.988695 |
| C    | 5.720458  | 1.110244  | 0.627301  | H    | -3.979056 | 3.817758  | -3.241034 |
| C    | 5.851665  | -1.294961 | 0.798554  | C    | -2.166515 | -0.247885 | 0.344053  |
| H    | 4.047052  | -2.372857 | 0.295496  | C    | -2.540320 | -1.407670 | 1.104213  |
| H    | 3.835101  | 1.899316  | -0.076479 | C    | -4.042273 | -3.485300 | 2.227288  |
| H    | 6.181280  | 2.089724  | 0.721109  | C    | -3.924395 | -1.573064 | 0.835548  |
| H    | 6.411453  | -2.194702 | 1.038615  | C    | -1.911891 | -2.321577 | 1.964148  |
| H    | 7.480450  | 0.039393  | 1.267115  | C    | -2.672345 | -3.349764 | 2.514993  |
| C    | 1.341736  | 0.286365  | 0.148832  | C    | -4.694258 | -2.591056 | 1.375887  |
| C    | 1.020925  | 1.121928  | 1.300195  | H    | -0.854925 | -2.226129 | 2.192645  |
| C    | -0.251858 | 2.662355  | 3.245562  | H    | -2.198455 | -4.064527 | 3.182170  |
| C    | 1.771085  | 1.647946  | 2.354079  | H    | -5.750322 | -2.680813 | 1.143025  |
| C    | -0.375279 | 1.362514  | 1.228196  | H    | -4.605273 | -4.299646 | 2.674185  |
| C    | -1.008687 | 2.129165  | 2.192377  | C    | -3.295528 | 0.173445  | -0.287777 |
| C    | 1.120858  | 2.419827  | 3.323259  | O    | -4.391034 | -0.594486 | -0.025874 |

absolute energy E (B3LYP): -1476.35246608 au

<sup>a</sup>Calculated by DFT method [B3LYP/6-31G(d)]

**Table S5.** The Selected Absorption of (*P*)-**1–3** Calculated by TD–DFT Method at the B3LYP/6-31G(d) Level of Theory

|       | excited state | transition energy (eV) | wavelength (nm) | main transition configuration (CI expansion coefficient)                         | oscillator strength $f$ | Rotatory Strength<br>( $10^{-40}$ erg·esu·cm/gauss) |                     | transition electric dipole moments (a.u.) |         |         | transition magnetic dipole moments (a.u.) |         |         |
|-------|---------------|------------------------|-----------------|----------------------------------------------------------------------------------|-------------------------|-----------------------------------------------------|---------------------|-------------------------------------------|---------|---------|-------------------------------------------|---------|---------|
|       |               |                        |                 |                                                                                  |                         | $R_{\text{velocity}}$                               | $R_{\text{length}}$ | x                                         | y       | z       | x                                         | y       | z       |
| (R)-1 | 1             | 3.5246                 | 352             | HOMO → LUMO (0.66852)                                                            | 0.0402                  | −28.0408                                            | −27.9770            | 0.1674                                    | 0.6420  | −0.1595 | −0.2803                                   | 0.4060  | 0.5962  |
|       | 2             | 3.6405                 | 341             | HOMO → LUMO+1 (0.64566)                                                          | 0.0702                  | −0.0310                                             | 1.1379              | 0.3880                                    | −0.3638 | −0.7103 | −0.3981                                   | −0.8916 | 0.2459  |
|       | 3             | 3.9846                 | 311             | HOMO−1 → LUMO (0.65536)                                                          | 0.3077                  | 44.7448                                             | 46.0587             | −0.4951                                   | −1.5800 | 0.6405  | 0.4860                                    | −0.5350 | −1.2491 |
|       | 4             | 4.0486                 | 306             | HOMO−1 → LUMO+1 (0.62751)                                                        | 0.3357                  | −48.7745                                            | −47.2841            | 0.7241                                    | −0.7894 | −1.4956 | −0.5213                                   | −1.5154 | 0.4134  |
|       | 5             | 4.3139                 | 287             | HOMO−2 → LUMO (0.46858)<br>HOMO → LUMO+2 (0.42326)                               | 0.0621                  | −29.3488                                            | −30.6337            | −0.3486                                   | −0.2343 | −0.6412 | 0.1461                                    | −0.2047 | −0.2073 |
|       | 6             | 4.3596                 | 284             | HOMO → LUMO+2 (0.47078)<br>HOMO−2 → LUMO (−0.36831)                              | 0.0303                  | 52.5987                                             | 53.2310             | 0.6404                                    | 0.2591  | −0.7063 | 0.0016                                    | −0.1231 | 0.2761  |
| (R)-2 | 1             | 2.8963                 | 428             | HOMO → LUMO (0.70392)                                                            | 0.0110                  | −9.3543                                             | −8.9640             | 0.0463                                    | 0.3637  | 0.1423  | 0.0297                                    | 0.1548  | −0.1380 |
|       | 2             | 3.4462                 | 360             | HOMO−1 → LUMO (0.69430)                                                          | 0.2207                  | −4.7145                                             | −2.1271             | −0.4761                                   | 1.4650  | 0.4905  | −0.1184                                   | 0.0185  | −0.1517 |
|       | 3             | 3.8275                 | 324             | HOMO → LUMO+1 (0.64303)                                                          | 0.2119                  | 1.1459                                              | 3.2585              | −0.4315                                   | −0.5325 | 1.3377  | 0.4585                                    | −1.5043 | −0.4612 |
|       | 4             | 4.0079                 | 309             | HOMO−2 → LUMO (0.70213)                                                          | 0.0003                  | 0.3028                                              | 0.3081              | −0.0007                                   | 0.0348  | 0.0458  | −0.0187                                   | −0.0589 | 0.0160  |
|       | 5             | 4.1177                 | 301             | HOMO−1 → LUMO+1 (0.61428)                                                        | 0.1646                  | 42.0854                                             | 46.3874             | 0.3768                                    | 0.3608  | −1.1662 | −0.2803                                   | 1.1407  | 0.4311  |
|       | 6             | 4.1398                 | 300             | HOMO−3 → LUMO (0.65245)                                                          | 0.0098                  | 8.4063                                              | 8.7941              | 0.2188                                    | 0.2190  | 0.0334  | −0.2234                                   | −0.0112 | 0.4204  |
| (R)-3 | 1             | 3.4366                 | 361             | HOMO → LUMO (0.68501)                                                            | 0.0330                  | −31.5369                                            | −31.2033            | 0.1402                                    | 0.5524  | −0.2589 | −0.1432                                   | 0.6092  | 0.7108  |
|       | 2             | 3.6098                 | 343             | HOMO → LUMO+1 (0.65694)                                                          | 0.1078                  | −1.1846                                             | −0.7116             | −0.1112                                   | −0.5955 | −0.9227 | −0.0758                                   | −0.7913 | 0.5165  |
|       | 3             | 3.9377                 | 315             | HOMO → LUMO+2 (0.47770)<br>HOMO−1 → LUMO+1 (0.44947)                             | 0.0767                  | 3.6022                                              | 4.9026              | −0.5520                                   | −0.3286 | −0.6180 | 0.1269                                    | −0.1278 | −0.0117 |
|       | 4             | 3.9791                 | 312             | HOMO → LUMO+2 (0.46482)<br>HOMO−1 → LUMO+1 (−0.34814)<br>HOMO−1 → LUMO (0.24808) | 0.0882                  | 166.7527                                            | 168.7944            | −0.3028                                   | 0.0875  | 0.8975  | 0.1065                                    | 0.3798  | −0.7989 |
|       | 5             | 4.0281                 | 308             | HOMO → LUMO+3 (0.53651)<br>HOMO−1 → LUMO (−0.40656)<br>HOMO−1 → LUMO (0.44502)   | 0.1286                  | 192.2917                                            | 198.3647            | 0.1567                                    | 0.6460  | −0.9283 | −0.1526                                   | 0.6956  | 1.3648  |
|       | 6             | 4.0481                 | 306             | HOMO → LUMO+3 (0.36395)<br>HOMO−1 → LUMO+1 (0.32045)                             | 0.2607                  | −376.3605                                           | −387.3010           | −0.0165                                   | −1.5624 | 0.4331  | 0.0647                                    | −1.3542 | −1.0889 |
